# Supplementary material
Source: PubMed Central journal article supplement (PMC8201806)
Supplement: pnas.2104765118.sapp.pdf [file pnas.2104765118.sapp.pdf]

## Supplementary Information for

### Knowledge extraction and transfer in data-driven fracture mechanics

Xing Liu<sup>1, †</sup>, Christos E. Athanasiou<sup>1, †</sup>, Nitin P. Padture<sup>1</sup>, Brian W. Sheldon<sup>1</sup>, Huajian Gao<sup>2,3,1</sup>

<sup>1</sup> School of Engineering, Brown University, Providence, RI 02912, USA

<sup>2</sup> School of Mechanical and Aerospace Engineering, College of Engineering, Nanyang Technological University, Singapore

<sup>3</sup> Institute of High Performance Computing, A\*STAR, Singapore 138632, Singapore

<sup>†</sup> These authors contributed equally.

\* Corresponding authors: Christos E. Athanasiou ([Christos\\_edouardos\\_athanasiou@brown.edu](mailto:Christos_edouardos_athanasiou@brown.edu)), Brian W. Sheldon ([brian\\_sheldon@brown.edu](mailto:brian_sheldon@brown.edu)), Huajian Gao ([huajian.gao@ntu.edu.sg](mailto:huajian.gao@ntu.edu.sg))

#### This PDF file includes:

Supplementary text

Figures S1 to S2

SI References

## Supplementary Information Text

### ML solution to the 2D cantilever problem

#### 1. Problem description

As shown in Fig. S1, a 2D notched cantilever, whose dimensions are  $\{a, H, L_0, L_1\}$ , is loaded at its free end by a line force,  $p$ . It is desired to determine the stress intensity factor at the crack,  $K_I$ , for a given  $p$ . This linear elastic fracture mechanics problem involves four independent dimensionless variables, *i.e.*,

$$\begin{cases} \underline{x}^{2D} = (x_1, x_2, x_3) = \left( \frac{a}{H}, \frac{L_0}{H}, \frac{L_1}{H} \right) \\ y^{2D} = \frac{K_I}{P(L_0 + L_1)a^{0.5}(H - a)^{-0.5}H^{-1.5}W^{-1}} \end{cases} \quad (S1)$$

The ML solution,  $I_{2D}$ , should provide an accurate output of  $y^{2D}$  for an arbitrary input,  $\underline{x}^{2D}$ , in a predefined parameter space,  $\Lambda_{2D} = [0.04, 0.8] \times [0.04, 0.4] \times [0.8, 5.0]$ .

#### 2. Data acquisition

The development of the ML solution is entirely data-driven. To provide a broad scope of the correlation between  $y^{2D}$  and  $\underline{x}^{2D}$ , 2,541 training data points are selected from a uniform grid across the entire parameter space,  $\Lambda_{2D}$ , with each input domain being discretized into (20, 10, 10) intervals. The target value of  $y^{2D}$  at each point is acquired from two-dimensional finite element simulations in ABAQUS (1), as shown in Fig. S2. Domain  $J$ -integral (2–4) is used to evaluate the stress intensity factor,  $K_I$ , at the crack tip. An *encastré* boundary condition is applied to the fixed end of the cantilever and a displacement-controlled boundary condition to the free end. More than 5,000 elements (CPE8) are employed with refined mesh near the crack tip.

To collect sufficient data for model assessment, a series of datasets are built by refining the interval of the sampling grid, *i.e.*,  $\{\chi_{2D}^{(0)}, \chi_{2D}^{(1)}, \chi_{2D}^{(2)}, \dots\}$ .  $\chi_{2D}^{(0)}$  corresponds to a uniform grid with (20, 10, 10) intervals in each dimension, and  $\chi_{2D}^{(n)}$  corresponds to the grid a  $(20, 10, 10) \times 2^n$  intervals.

### 3. Model training

A simple fully connected NN (“3/64/64/1” with the “ReLU” activation function) is selected for this problem. The training of NNs is performed on the open-source platform TensorFlow r2.2 (5), with the “mean absolute percentage error” loss function and the Nadam algorithm. A two-step strategy is adopted, *i.e.*, 10,000 training iterations with a learning rate of 0.01 followed by another 10,000 iterations with a learning rate of 0.001. In this way, the trained NNs make accurate predictions on the training dataset. However, its performance outside the training data points is yet to be investigated.

### 4. Model assessment

To correctly assess the accuracy of the trained model, its performance is tested on a series of assessment datasets, *i.e.*,  $\{\chi_{2D}^{(0)}, \chi_{2D}^{(1)}, \chi_{2D}^{(2)}, \dots\}$ . Most of the trained models can be correctly assessed with  $\chi_{2D}^{(2)}$ , *i.e.*, a convergent value of model accuracy is observed with 136,161 data points. Among these well-assessed models, one can choose the appropriate model as the ML solution according to their accuracy. Consequently, with 2,541 training data and 136,161 assessment data, a ML solution with less than 3.21% prediction error can be obtained.

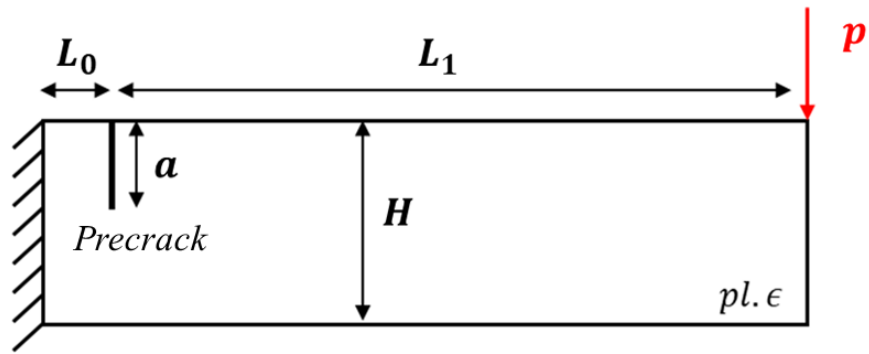

$$K_I = p \cdot \Gamma_{2D}(a, H, L_0, L_1)$$

**Fig. S1. ML solution to the 2D notched cantilever problem.** A 2D notched cantilever, whose dimensions are  $\{a, H, L_0, L_1\}$ , is loaded at one end by a line force,  $p$ . The solution to this problem,  $\Gamma_{2D}$ , describes the stress intensity factor at the crack,  $K_I$ , for a given  $p$ .

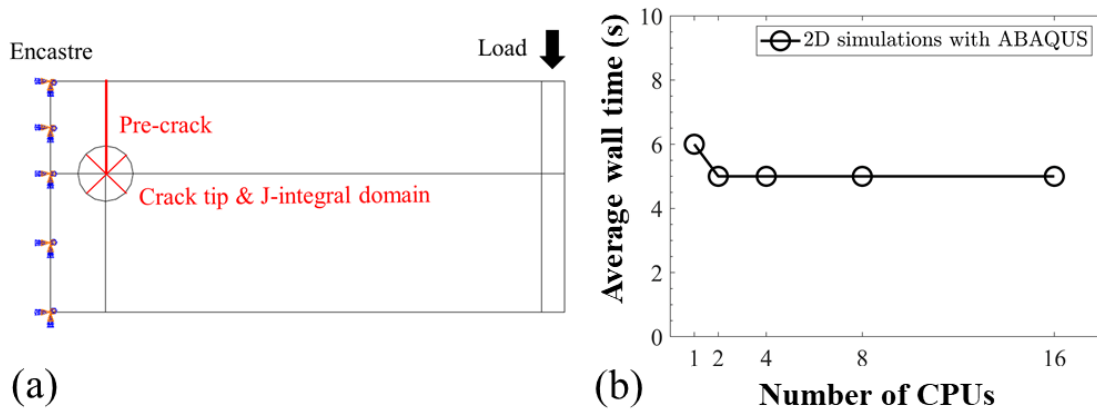

**Fig. S2. Data acquisition from FEM simulations.** (a) The domain J-integral method is used to evaluate the intensity factor at the crack tip. An *encastre* boundary condition is applied to the fixed end of the cantilever and a displacement-controlled boundary condition to the free end. (b) The computational cost of the two-dimensional simulation is low, and parallel computing cannot further reduce the time. The average wall time for each simulation is ~6 seconds when running on a single CPU with ABAQUS.

## SI References

1. Abaqus, *Abaqus Reference Manuals*, Version 6.10 (Dassault Systèmes Simulia, Providence, RI, 2010).
2. J. R. Rice, A path independent integral and the approximate analysis of strain concentration by notches and cracks. *J. Appl. Mech.* 35, 379–386 (1968).
3. C. F. Shih, B. Moran, T. Nakamura, Energy release rate along a three-dimensional crack front in a thermally stressed body. *Int. J. Fract.* 30, 79–102 (1986).
4. T. D. Nguyen, S. Govindjee, P. A. Klein, H. Gao, A material force method for inelastic fracture mechanics. *J. Mech. Phys. Solids.* 53, 91–121 (2005).
5. M. Abadi *et al.*, TensorFlow: Large-Scale machine learning on heterogeneous systems. arXiv:1603.04467 (14 March 2015).
